# Supplementary material for: Construction of a Dual‐Fluorescence Reporter System to Monitor the Dynamic Progression of Pluripotent Cell Differentiation
Source: Hindawi journal article supplement (doi:10.1155/2016/1390284), 2016-01-01
Supplement: f1 [file 1390284.f1.pdf]

|       |                                                               |        |
|-------|---------------------------------------------------------------|--------|
| Cow   | -----GGATCC-TGGGATCGCA-T-GGGATCGCAGAGTCGGACACAACCTGAAGCA      | [ 60]  |
| Human | GCTCTGTGAAGGGTCT-TGACATTGCACT-GTAATAATAAAGGTGTGTG-----TGAAGTA | [ 60]  |
| Pig   | GTGGGGTGAGGAGTGTATGTGGAGAGTCT-GCAAACCCAGGCCTAAATTGGTTTGGGGGA  | [ 60]  |
| Mouse | ACTCTGTAGACCAGGC-TGGCCTGGAACCTCAGAAATCCACCTGCCTCTGCCTCCCAAGTG | [ 60]  |
|       |                                                               |        |
| Cow   | ACTGAGCATGCACCATGCACGCACAAGACCCAAGAGAGTTGGAGGAGCCAGGTCTGATGA  | [ 120] |
| Human | TCTTTTTATG----GTGACTTTCTAAAAACCCAGGGAA--TCATGGGACCAGTTCTGATGA | [ 120] |
| Pig   | CTTGAAGTTTTTTTAGTGACTCCCT---ACCCAAAAGAG-TGGAGAAGCCAGGTCTGATGA | [ 120] |
| Mouse | CTGGGATTAAAGCCATGAGTTGGGA--CCGCACCCGGCCCAAAGTGACTCTTAAAGGGGG  | [ 120] |
|       |                                                               |        |
| Cow   | CTCAAT-TGGCTTGCAGTCTCCTCTGG-GCCT-----GCA-----                 | [ 180] |
| Human | CTCAGCCTGGCTTCCAGTCTCCTCCAG-GCCCAACGGTGGCCCCCAGCACTGGTTGGGGC  | [ 180] |
| Pig   | CTTAACCCCACTTGCAGTCTGCTCTGG-GCCT-----GCA-----                 | [ 180] |
| Mouse | CAGAGTGGCACATATTTTCAATCCTAGCACTCAGGAAGCAAAGGCTGGTGGATCTCTGTG  | [ 180] |
|       |                                                               |        |
| Cow   | ----GAGAGCTGGTCTGGGCAGAAGTGAAGCTACCTACCCTTC--AGGTTTAAACAGAAGG | [ 240] |
| Human | CTGGGAGAGCTGGCCTTGGCTGAAGTGAAGCCACCTACCCTTC--AGGCATAACAGGACA  | [ 240] |
| Pig   | ----GAGACCTGGCCTCTGCAGAAGTGAAGCTGCCTACACTTC--AGGCCTAACAGGAGG  | [ 240] |
| Mouse | AGTTCAAGGCCAGCCTGGTCTACAGAGTGAGTTCCAAGCCATCTAAGGCTATGTAGGGAA  | [ 240] |
|       |                                                               |        |
| Cow   | GTGGGGATGGGAG---GGGAGGGTGCCTCA--GCCTTGCCAGCCTCAGCACCCCAAGACA  | [ 300] |
| Human | GTGAGAA-GGAAG---GAAAGCCTGCCTCA--ACCT-----CCCATCAGCCCTGAGCA    | [ 300] |
| Pig   | GTGGGGAGGAGAG---GGGAATAGGC-TCA--GCCCTGCCATGCCAAGCACCCCAAG--   | [ 300] |
| Mouse | CCCTTGAATCAAACCCAAAAGTTAGTCTGATGATTTTCTAAGACCCAGGAGGCAAGAAAC  | [ 300] |
|       |                                                               |        |
| Cow   | TAGCTGGAAGGAACTGCAGACAACTTAACTTTCCACTAAGGTT-CTGGGTCTGG--ACTC  | [ 360] |
| Human | CCCCAGAAGGGGGCCG-----GCTAGGAGT-CTAGGCA-----TG                 | [ 360] |
| Pig   | ---CTGACTAGAACTCCAGACAAATTTAGCTTGTCTTAAGGTT-CTGGGTCTAG--ACCC  | [ 360] |
| Mouse | TGGATCAGATGAGCCAACAGGTCTGCTGTCCATCTCCAGGGCCACCAGGCTCACAGCTC   | [ 360] |
|       |                                                               |        |
| Cow   | CAGGCAAGCACAGGACTGATCTGGCTCAGATGTCTGGCTGACAGCCAACCAGGAACC-CT  | [ 420] |
| Human | CAGG-AGGCTGACCCCTGACTGGGCTCA--TATCCAGCCACAAGGCAGCCAGGGATC-CA  | [ 420] |
| Pig   | CAGGCAAGCACAGAACTGATCTGGCTCAGATGTCTGGCTACAAGCTATCCAGGAACC-CA  | [ 420] |
| Mouse | GGGACCAGGCTAGGGCACATCTGTTTCA---AGCTAGTTCTAAGAAGACTTGGGACTTCA  | [ 420] |
|       |                                                               |        |
| Cow   | GGCACCCCTCCCCTC--CCATC-----TCTCCCTCTGGTATGGGA----CTCTTGC      | [ 480] |
| Human | GGCACCCACCCCTTGTCTGCG-----TCCCTCTCGGGAATGGGC----CTCTTGC       | [ 480] |
| Pig   | GGCATCCAGCCCTCCCCAGCCCTCCCAGGCTTTCCCTCTGGAATAGGAAGGACACTTGC   | [ 480] |
| Mouse | GACAAAGTTGCTGTTAAGGACTGTATTATACTCTAGGCACGCTTAGGGCTAACCTGGTTG  | [ 480] |
|       |                                                               |        |
| Cow   | CAAG-----AAACATACCGCTTAGAGCAATCAGATTACTG-ATTGTAATCTCAAAGGGT   | [ 540] |
| Human | CCAGGCCAGAAATACACCACCTACAGTA--CAAATTAT---AATCTAAAAACAAGAGGGT  | [ 540] |
| Pig   | TTAAACCAGAAACATACCATCTAGAGCAG-CTATTTATGGTGATCTAAAAAACACAGGGT  | [ 540] |
| Mouse | CAAAGCCAGTCACTAGGCAGTTAAAGGACTCAGAATAT-GTCTCTTGTCTTGCCAGTGA   | [ 540] |
|       |                                                               |        |
| Cow   | ATTGTTGAGTTGGGGG-----AAAGGCAGAAGGT--GTTTTAGGGGCTGCTGGGAAG     | [ 600] |
| Human | GGTGTGAGT-GGGGA-----AATTGGGGAAGGT--GTTTTAGGAGCCACTAGGAAA      | [ 600] |
| Pig   | GCTATTTAGTCGGGGGTGGGTGG-GAAGGGAGAAGGT--GTTT-AGGGTCCGCGGGAAAG  | [ 600] |
| Mouse | GTCACCAAAGAGAAATCACAATCCATAAGACAAGGTTGGTATTGAATACAGACAGGACT   | [ 600] |
|       |                                                               |        |
| Cow   | A-----CAGCAGTG-----CAGGGGCCACATGAGAAGGGA---TTCTGAGAGCCTAGAGG  | [ 660] |
| Human | AT-GGGCAGCAGGGACTCTCTGGACTGGCTTGGGAAGAGCGCTTTTGGGGAACCTGGAGG  | [ 660] |
| Pig   | TCAGGGGCACAGGGGCTCTCTGGACC-ACATGGGGAGAGGGGTTTCTGGGAGGCCAGAGG  | [ 660] |
| Mouse | GCTGGGCTGCAGGCA-TACTTGAAGTGTGGTGGAGAGTGC---TGTCTAGGCCTTAGAGG  | [ 660] |
|       |                                                               |        |
| Cow   | GTGGCGATCGAGGCAAGGAGCATTGCTGT--AGATT-----TCCTAGGTCTGCCCC      | [ 720] |
| Human | ATGGCAAGC----TGAGAAACACTGGTGTGGAGATTCCAGCCAAA                 | [ 720] |
| Pig   | GCGAGGAGC----CAAGGAGCTCAGCAGT--AGATT-----CCCTAGGCCCGCCCC      | [ 720] |
| Mouse | CTGGCCCTG----GGAGGAAC-TGGGTGTGGGGAGG-----TTGTAGCCCGACCCCT     | [ 720] |

|                |                                                                      |        |          |
|----------------|----------------------------------------------------------------------|--------|----------|
| Cow            | <b>TCCCC-CTCCTCTGGGAGGCTGTC--TTCTTGG-AAACAGCAAATAAAATGCATGACAAAG</b> | [ 780] | <b>C</b> |
| Human          | <b>TCCCC-CTCCTCTGAGAGGCCGTC--TTCTTGGCAGACAGCAGAGAGATGCATGACAAAG</b>  | [ 780] |          |
| Pig            | <b>TCCCC-CTCCTCAGGGAGGCCGTC--TTCTTGGCAGACAGCAGATAGATGCATGACAAAG</b>  | [ 780] |          |
| Mouse          | <b>GCCCTCCCCCAGGGAGGTTGAGAGTTCTGGGCAGACGGCAGA----TGCATAACAAAG</b>    | [ 780] |          |
| <b>2A (DE)</b> |                                                                      |        |          |
| Cow            | <b>GGACCCTGATGGCTCTGTCTTGGGGGTGGGGACATGGCTGGGGAGGGGCC-CCTCCTGG</b>   | [ 840] | <b>4</b> |
| Human          | <b>GTGCCGTGATGGTTCTGTCTTGGGGATTGAG--ATGGCTGGGGAGGGGCCCTCCTCCTGT</b>  | [ 840] |          |
| Pig            | <b>GGGCCATGATGGCTCTGTCTTGGGGGTGGGGAGATGGCTAGGGAGGGGCC-CCTCCTGG</b>   | [ 840] |          |
| Mouse          | <b>GTGC-ATGATAGCTCTGCCCTGGGGGCAGAGAAGATGGTTGGGGAGGGGTC-CCTCTCGT</b>  | [ 840] |          |
| Cow            | TCCAAAGCACATCTC-CCCACCCCC-ACCAGGTCCCTTAATCTATCAGGTTTTTTTGGCA         | [ 900] |          |
| Human          | TCCGAAGCATGTTCTCCCACCCCC-ACCAGGCCCCATAATCTACCTG-CCTTTTGGGCA          | [ 900] |          |
| Pig            | TCTGAAGCACATCTT-TCCACCCCC-ACCAGGCCCTTAATCTATCTG-CTTTTGGGGCA          | [ 900] |          |
| Mouse          | CCTAGCCCTTCCTTAATCTGCTATTGAGGAAGCTTGTGAACCTGGCGGCTTCCAAGTCG          | [ 900] |          |
| Cow            | -----ATTAGTGGCTTAGAGGCAAATATAGCTCCAGTTTTTGCTGC---CCTGTAGAT           | [ 960] |          |
| Human          | -----GTTAAAGGCCGAGAAGTGAACACAGCTGCAACCCCACTGC---CTTGTAGAC            | [ 960] |          |
| Pig            | -----GTTAGTAGTTTAGAGTTGAA-ATAGCTCCAGCCCTGCTGC---CCTATAAAT            | [ 960] |          |
| Mouse          | CTGCCTTTATTTAGGTCTTCCAATAACCTATGGCACTGTCCACAATGAATGTATAGAA           | [ 960] |          |
| Cow            | CTT-----TCATCA-GACCTATGGGAAGTCTTGAAATGCACACATATA-----                | [1020] |          |
| Human          | CTT-----CCGGCA-GACCTGTGGCAGGTATTGAAATGCACGCATACAA-----               | [1020] |          |
| Pig            | CTT-----TCAACA-GACCTATGGGAAGTATTGAAATGCATGCACGCAA-----               | [1020] |          |
| Mouse          | ATTGGGAGGTGAGCATGACAGAGTGGAGGAAACGGAAGATTTCATGGAGAGGGCCAGAGAG        | [1020] |          |
| Cow            | -----TTAGTTGCCCAAAAAG-----TACTCACAGATGAGCTGGAACCTGGGGCTAT            | [1080] |          |
| Human          | -----TTAG--GCTCAAAAAG-----TCTACACAGA----CAGGAGATGGG-----             | [1080] |          |
| Pig            | -----TTAGTCACCCCAAACG-----CACAGGCCGATGGGCACCTGGAAGAGATTCA            | [1080] |          |
| Mouse          | ATGGCCCCCTCAGCCACCCTGGGGGATGACTTGACCCTATGTGGTAGAAGGAGGGGACTTC        | [1080] |          |
| Cow            | GTGATACGAATTT--AGGAGAGAGTTAAGAAAAAAAAAACAGGCTCAAAAGA-----            | [1140] |          |
| Human          | --CACACGAAC----AGAGGCAACATAAGAGTGGGGGAAAAGTCTCAAAAGA-----            | [1140] |          |
| Pig            | GAGGAGAAAAAGC--AAAACAAAACAACACGGACACACAAAAACCCAACAGA-----            | [1140] |          |
| Mouse          | CACACATGTGCTATGTGTAGCTGTGTGTAGGTACATACACACCCTTAAAATAAAACGCAA         | [1140] |          |
| Cow            | -----TTCCTAG-----ATACGACCAAGGTGAAGACAGCAGGCCACAGTCAAGAGGAC           | [1200] |          |
| Human          | -----CTCACGG-----ATGCCACCAAGATGAAGACAGCTGGCCACG-----GGAC             | [1200] |          |
| Pig            | -----CTCAAAG-----G-ACTCCT--GGTGGAGCTAACTGGTCACAGTCTGGAGGAT           | [1200] |          |
| Mouse          | TTTTTTTTTCAAAGTCTCAGGGTGAATTTGGTGAAGTCGATGAAGCTGAGGCAGGAGAAT         | [1200] |          |
| Cow            | CCCCAGCACCTCAGAAG-----GCAGATG-----CTGAGCAAATAG--                     | [1260] |          |
| Human          | ACCCATCCCCTTAGAAG-----GCAGATAGAGCCACTGACCCAGCAGACAA--                | [1260] |          |
| Pig            | GCC-AGCCCCCTCAAGAC-----AGATGCCGAGCCACTGACCCTAGCAAACAA--              | [1260] |          |
| Mouse          | TATCAGGAGTTCAAGGGCAGCTTGTTTTATAGAGAAAGTTCCATCTCTACCTGATGAAG          | [1260] |          |
| Cow            | --CCTCAGACAGGGCGGGGA-----TGTAGAGA-----TGTCTAAGTCAAC--AG              | [1320] |          |
| Human          | --GCCCAGGCAGGGCTGAGCCTGGAGCCTGCAATGAGAAAGCCTTACTTAAGTCGAC--AG        | [1320] |          |
| Pig            | --CCTCAGACCCAGCCAAGA-----TGAAGAGG-----TGTCTAGGTCCGC--AG              | [1320] |          |
| Mouse          | ACTACCATCAAGAGACACCCCCGCCCCCAGGGCACCTAGAGCCACTGACCCTAGCCAAC          | [1320] |          |
| Cow            | AGGTC---CATGC----TCCAGGCTCAGGATTCTGGCCTTCCAAGGTGTATGGAGCTCTG         | [1380] |          |
| Human          | AGGTCAG-CGTGCCCAGTCCAGACCTGGCCTTCTGGCCTTCAAGCTGTGGGGAGCCCTG          | [1380] |          |
| Pig            | AGGTC---TGTGT----CCCAGTCTCAGGAGTCTGGCCTCC-AAACTGTAGGAAGCTCTG         | [1380] |          |
| Mouse          | AGCTCAGGCGGGCTGGGCCCAGGCTCAGAACTCTGTCTGGCTATGTACACTGTGGGGTG          | [1380] |          |
| Cow            | G TTCACAGCCTTTCCGGAGT--CCCCCAATTAC-----CTCGGGGCCTTCATTTGGGG          | [1440] |          |
| Human          | GCCCAGAGCCCCCTCTGGAG--CCCCCAGACTTAC-----CCCAGGGCCCTCCACTGAGAT        | [1440] |          |
| Pig            | ATCCATGGCTTCTCTGGAGAGCCCCCTCACTCAGGTTCACTGGGGCCCTTCGTTTAGGG          | [1440] |          |
| Mouse          | CTCTGGG---CTTTTTGAGG--CTGTGTGATTAC-----CCTGGGGCCCTTCGTTACAGAG        | [1440] |          |

Cow CAAGTTTGGGGAGCAGACAGACAAACATCATTCCTAGCAGACAGGCAATCTGAAAGCTAT [1500]  
Human CAAGTTTGGGGAGCAGACAGACAAACATCATCCCTCACAGACAGGCATTCCGTTGGCTAT [1500]  
Pig CAAGTTGGGGGAGCAGACAGACAAACATCATCCCCAGCAGACAGCCAGTCTGAAAGCTAT [1500]  
Mouse CATGGTGTAGGAGCAGACAGACAAACACCATCCCTTGCGACAGGCACTCTGAGGGCTAT [1500]

C  
R  
3

Cow TCTCTTGCAAACAGAGAATAAGCACTAAGCCTTCAGTGTGAGCC-----CTCAGGAC [1560]  
Human TCTCTTGCAAACAGA-ATCAAGCACTAGACCA GCAGCATGAGCCTCAGGATACTCAGGCC [1560]  
Pig TCTCTTGCAAACAGA-ATCAAGCACTAGGCCA GCAGCCTGAGCC-----TCAGGAC [1560]  
Mouse TCTCTTGCAAAGATA-ACTAAGCACCAAGGCCA GTAATGGGATCC-----TCAGACT [1560]

Cow CAGCCCAGA-----CCCTGTGGGAGAGCTTAGGTCAGGCTTCTTGACCTCCACCCC [1620]  
Human AGGCCCAGAAAAACAGACCCTGAAGGGGAGCTTAGGGCAGCCTTCCTGCACGCCT-CCAC [1620]  
Pig AGACCCAGAAAAATAGACCCTGTGGGAGAGCTTAGGGCAGGATTCTGCACCCCCCTCCCC [1620]  
Mouse GGGCCCAGAAAA---CCTACTAGGGAAAGTTCAGGGTAGGCTCTCTGCACCCCCCTCCTC [1620]

Cow AAGTCGCTCTCCTCTTCCT-CCTCATCTTTTTTGCCAGCC----CCCCTAAACAAGGC--- [1680]  
Human AAATCACTCTCCACCTCCT-CTGCGTCTTTCTGCCAGCCAGCCCCACTAAACAAAGCACA [1680]  
Pig AA-TCGCAGTTCACCCCCCTTCTGCATCTTTTCGCTAGCC-----CCCCAAACAAAG---- [1680]  
Mouse ----CTAATCCCGTCTCCT-TAGTGTCTTTCCGCCAGCA-----CAGGAATGGGG---- [1680]

Cow -----CTGGGGGGCGGGGGGAGGGGTAGAAGATGAGGCTGAATGCCTGCGTCCTCT [1740]  
Human TCCCTCAATCTGCCAGGCTCGGGGAGGGACGCACGATGAAGCTGGACGCCTGAGTCCCCC [1740]  
Pig -----GCCTGGACGCCTCAGTCTCTCT [1740]  
Mouse -----GAGGGGTGGGTGACGAGGATGAACACCGGAGTCC-CT [1740]

### 1A (PE)

Cow ACAGG-----GGGACGGGATACCTAGGCCCCAGTGGGCGGCCCT-----GTCTGAGG [1800]  
Human AGAGGAAGGAGGAAGTAGATACCTAGGTCCCTGTGGGGGGCCCTTGGTGCCCGTCTGAGG [1800]  
Pig AGAGGG-----GGGACAGGATACCTAGGTCCCAGTGGGGGGCCCT-----GTCTGAGG [1800]  
Mouse GGAGGAAGG-GAAGCAGGGTATCT-----CCA-----TCTGAGG [1800]

Cow CTCACAGTCTTTGAGGGGTGGTGGGGGGGTGGTTGCTGCAGGAGCTCTTTTAGCTGCTC [1860]  
Human CTCA--GTCTTTGAGGGGATTGCAGAGGGG-GGTTGCTG--GAGCTCCTTTTAGCTGCTC [1860]  
Pig CTCA--GTCTTTGAGGGGAT---GGGGGTGTTGTTGCTG---GAGCTCTTTTAGCTGCTC [1860]  
Mouse CTCT--GTCTTTGAGGAGA----GGTGGAG----AGCTG----- [1860]

Cow TGAGGGGGATTCT-TAGGA GGGGATTGGGGCT----GGGGG-TTGGGGGGCAGGAAGCTG [1920]  
Human TGAAGGGGATTCTGTGTGA GGGGATTGGGACT----GGGGGGTTGGGGAGCAGGAAGCAG [1920]  
Pig TGAAGGGGATTCTGTGTGA GGGGATTGGGGCT----GGGGGGTTGGGGGGCAGGAAGCTG [1920]  
Mouse ---GGGAAGTCTTGTGTGA GGGGATTGGGGCTCAGGAGGGGGTTGGGGAGCAGGAAGTTG [1920]

Cow TCCCCAGGGGAGCCATCCAGGCCCATTTCAAGGGTTGAGCACTTGTTTAGGGTTAGAGCTG [1980]  
Human TCCCCAGGGGAGCCATCCAGGCCCATTTCAAGGGTTGAGCACTTGTTTAGGGTTAGAGCTG [1980]  
Pig TCCCCAGGGGAGCCATCCAGGCCCATTTCAAGGGTTGAGCACTTGTTTAGGGTTAGAGCTG [1980]  
Mouse TCCCCAGGGGAGCCATCCTGGCCCATTTCAAGGGTTGAGTACTTGTTTAGGGTTAGAGCTG [1980]

### 1B (PE)

Cow CCCCCCTCTGGGGACCAGGATTGTCCAGCCAAGGCCATTGTCCGGGCCCTTCCCCCAGTC [2040]  
Human CCCCCCTCTGGGGACCGGGATTGTCCAGCCAAGGCCATTGTCCCTGCCCCCTTCCCCCAGTC [2040]  
Pig CCCCCCTCTGGGGACCAGGATTGTCCAGCCAAGGCCATTGTCCGGCCCCCTTCCCCCAGTC [2040]  
Mouse CCCCCCTCTGGGGACCAGGATTGTCCAGCCAAGGCCATTGTCCCTGCCCCCTTCCCCCAGTC [2040]

Cow CCTCCCAAGCCCCCTTTGAACCTGAAGTCAGATATTT-TT-TTTCTCCCC-T-TCTACCTC [2100]  
Human CCTCCCAAGCCTTCTTTGAACCTGAAGTCAGATATTT-TT-TCTCCACAC-C-CCCCACCC [2100]  
Pig CCTCCCAAGCCTCTTTGAACCTGAAGTCAGATATTT-TTCTCTCCCCC-CACCTCCCTC [2100]  
Mouse CCTCCCAAGCCCCCTTTGAACCTGAAGTCAGATATTTCTTCTCTTACCCACCTCCCACCC [2100]

Cow CTAGGCTTTTCCCACCCAGGGCCTAGGGCTGGAGGTCTGGGGT-GGTAGGAGGGGG-AGG [2160]  
Human CCTGGTTTTTCCCACCCAGGGCCTAGGGCTGGAGGCTGGGCCAGGGAGGTGGGGG-AGG [2160]  
Pig CTTGGCTTTTCCCACCCAGGGCCTAGGGGTGGAGGCCAGATT-GGGAGGTGGGGG-AGG [2160]  
Mouse GTTGGGTTTTCTCCACCCAGGAACTAGG-CTGGAAGCCTGGGATGAGGAGGTGGGGGGAGG [2160]

C  
R  
2

|       |                                                               |        |
|-------|---------------------------------------------------------------|--------|
| Cow   | GAGAACCT--TCAACTGTGGTTCTAGATATTTGGGTCTCTG--AAGAGG----GGGGCAA  | [2220] |
| Human | GAGAACGGGGCCTACCGTGGTATTAGATGTCTGAGTTTGGTTGAGAGG----GGAGCAA   | [2220] |
| Pig   | GAGAACAG--TCAACTATGGGGCTAGATATTTGGGTCCCTGAAGGGGGGCTGGGGGACAA  | [2220] |
| Mouse | GAGAACTG--AGAATCTTGAGGAAAGAGGCCCGCCTTAAGTGTGAGG-----GGAT      | [2220] |
|       |                                                               |        |
| Cow   | GGAACCTGATGCACG---GGACCCACAGTGAGGGACCCGTGGTGTGGTGT--GTCCAATC  | [2280] |
| Human | GGAACCTGATGTGCA---GGTTCCATAGTGAGGGGGGCCAAAGCGG-GT--GTCTTATC   | [2280] |
| Pig   | GGAACCTGATGTGCGCGGGGACCCACAGCGGGGGACCTGCGAGCGGGTGTCCGATTGATT  | [2280] |
| Mouse | GGAGCCTGG-GTGCA---GGTCTTATGGGGGTTGGGGGGTGGT-TAGTGTCTAATCTACC  | [2280] |
|       |                                                               |        |
| Cow   | CCTCTGGCTGGACAAAGGTAGGGAGACTCAGGCCTAGTCAGTCCAGAGCCTGGCCCC---  | [2340] |
| Human | ACTCTGTTTTAGCAAAGGTTGGGAAACTGAGGCCAGTCAGTCCAAAGTCTGGTCCCTTG   | [2340] |
| Pig   | CCTCTGCCTGCACAAAGATTGGGAGACTCAGGCCAGTCCATC--GAGCTTGATCCCTGG   | [2340] |
| Mouse | AACCTGGAC-AACACAAGATGGAATACT-GTGCTCTGAAAACGCAGAGCCAGCACTTCT-  | [2340] |
|       |                                                               |        |
| Cow   | ----GAAAGTAGGGTTTCCATCCCTGGGTCTGGTAGGTGAGGGGCCTCTGGAGTCAG---  | [2400] |
| Human | AAGGGGAAGTAGGGAC-CAACCCCTTAGTCTGTTAGATGAGGAGAGTCTGGAGTCTGATT  | [2400] |
| Pig   | AAGGGAAAATGGGGGTTCCATCCCTGGGTCTGGTGA-AGGGAGGCCCCGGAACCCG---   | [2400] |
| Mouse | -----CTGGGGTCTCTGGGGACATATCTGGTTG-----GGGCTCGGGTCCC---        | [2400] |
|       |                                                               |        |
| Cow   | -----GAAAGCTGGGG-----ATGGAATGGAAGC-TGGTC                      | [2460] |
| Human | CTGGAAGACGGAGGGGTGGGGGGATGGGGGGTGGGGGGATATAGCACGGAGGCCTTGTC   | [2460] |
| Pig   | -----GAAACTG-----TACGGAATGGAAGC-CCGTG                         | [2460] |
| Mouse | -----ATGGTGTAGAGCC----TC                                      | [2460] |
|       |                                                               |        |
| Cow   | TGGCAGCCTGCCCCCTGGTGATGGGGTGGATTTTAGCAGGCTGGGCAGAGGGGTACCAGGC | [2520] |
| Human | TGGCAGTCTACTCTTGAAGATGGGGTGAAATTTGGCAGGCTGGGCAGATGG-TGCCAGGC  | [2520] |
| Pig   | TGGCAGTCTGCCCCCTGGTGA-GGGGTGGAATCTAATAGGCTGGGCGGATGGTTGCTGGGC | [2520] |
| Mouse | TAA-----ACTCTGGAGGACTGGAGGTGCAATGGCTGTCTTGTC---CTGGCCTTGGAC   | [2520] |
|       |                                                               |        |
| Cow   | ATCACAGTTTTGAAAAG--TGAAAGTGTTAGTCA-T---GTCCGACTCTTTTTGACCC-   | [2580] |
| Human | ACCCAGGCTGCGGGGTGGCTGGATTTGGCCAGTA-TCGGGATGGGAATGCCTAGGATTCT  | [2580] |
| Pig   | ATCGCAGCTTTGGGGTGCCGGAATCTGGCCAGTAATCTAGTTGGGAATGCCTAGGTTCC-  | [2580] |
| Mouse | AT--GGGCT--GAAATA-CTGGGTTCACCCA-----TATCTAGGACTC-             | [2580] |
|       |                                                               |        |
| Cow   | --ACAGATTGTAGCCCGCC----GAGTTCCCTCTGTCCATGGGATTTCCAG-GCAAGCAT  | [2640] |
| Human | GGATGGATCGGGGGAAGGCATAAGGGAGCAGCTGGCCATTGTGCTTATGGCTGTTGATGC  | [2640] |
| Pig   | ---CGGACTGGGGGT-----                                          | [2640] |
| Mouse | ---TAGACGGGTGGG-----                                          | [2640] |
|       |                                                               |        |
| Cow   | ACTGGAGTGGGTGCGCCATTTCTTTCTTCAGGAGATCTTC-----CCAAC            | [2700] |
| Human | ATTGAGGGATAGCGCCACACACACATTCAATAAAATTTGAGGAGCTGAGAGGGTGACTGGC | [2700] |
| Pig   | -----                                                         | [2700] |
| Mouse | -----                                                         | [2700] |
|       |                                                               |        |
| Cow   | CC----AGGGATACAACCAG-GGTCTCTGGCATTGCAGGCAGATTCTTTATCATCTGAGC  | [2760] |
| Human | CCCTGAAGGCACAGTGCCAGAGGTCTGTGGAGAGGGGTCAAGCACCTGGGTTCCCTGAAG  | [2760] |
| Pig   | -----                                                         | [2760] |
| Mouse | -----                                                         | [2760] |
|       |                                                               |        |
| Cow   | CACCAGG-----GAAACGAATCTGCCCAGTTG-----TCTAAA-----              | [2820] |
| Human | AACATGGAGGTGTGGGAGTGATTCCAGACAGCTGGGATGTGCAGAGCCTGAGAGAGTGCC  | [2820] |
| Pig   | -----GAG-----                                                 | [2820] |
| Mouse | -----                                                         | [2820] |
|       |                                                               |        |
| Cow   | -----TGGGAACTGC---CTAGGT-----TCCTGGACTGGGATGCT                | [2880] |
| Human | AGGGAGCGGGTTGGGAGTTGAAAGTTGGGTGTGGTGGCTCACGCCTTTAATCATGACACT  | [2880] |
| Pig   | -----                                                         | [2880] |
| Mouse | -----                                                         | [2880] |

Cow GGAGGACAACGGGGAAGGAGCCTGTTAAGAATTGAGGGGTAGCCCCAGTGGGACTTGACA [2940]  
Human GGGCGGCAGAGGCGGGAGGATTTCTTGAGGACAGGAATTCAAGACCAGCCTGGGT-AACA [2940]  
Pig ----GGCAGAGAG-----CAGGAATTGAGGAGTAGCTCCGGCAGGACTTAGCA [2940]  
Mouse -----TAAGCAAGAACTGAGGAGTGGCCCCAGAAATAATTGGCA [2940]

Cow CATAACAGCATAAATGTGTTTGAGGAGTTGAGAGGGTGGCTGGTCTCAGGTGCCAGGGTGT [3000]  
Human TAGCAAGGCCCCATCTCTACTAAAAATAAAAAAACTAACAGGGCACAGTGGTCCAAGCCT [3000]  
Pig CAGACA--CCAGACCTGTGTGAGGACCTGAGAGGGTCGCTGGG----GTCCCTTGAGGAG [3000]  
Mouse CA-----CGAACATTCAATGGATGTTTTAGGCTCTCCAGAG----GATGGCTGAGTGG [3000]

Cow CTGGAGAGGGGTCCTGAAGAACGTGCAG--GGGGTATGGAAGGGACCCCTCACCCCTGGT [3060]  
Human GTAGTCCCAGCCACTTAGGAGGCTGGAGCAGAAGGATTGCTTTGGCCCAGTAGATCGAGG [3060]  
Pig ACAGTGCCAGGGTCTTTCGAAGAGGGGTCC-AACACCTGGCTC---CCCGACAGCCCCAAT [3060]  
Mouse GCTGTAAGGACAGGCCGAGAGGGTGCAGT-GCCAACAGGCTTTG--TGGTGCGATGGGGC [3060]

Cow GTATGT-GGGCCTGG-GGAGGGCTGGGCAGC----CTGTTGGGAGCTGGAAGTGAAGGCC [3120]  
Human CTACATTGAGCCATC-ATTGTACTCCACTGCACTCCAGTCTGGGCAACAAAGTGAGACCC [3120]  
Pig GTGCACAGAGCAGTGGAGAGGGCCGGGCGGC----CGGTTGGGAGTTGGAGGTGAAGGCC [3120]  
Mouse ATCCGAGCAACTGGTTTGTGAGGTGTCCGGT----GACCCAAGGCAGGGGTGAGAGGACC [3120]

Cow CGCATGGGGGACCTGCACCGAGAG-----TCTAGGAGTCTGGGGCCTGGA-----GAG [3180]  
Human TGTCTTAAAAAATAAAAAATAAAAAAAGTTTCTGTGGGGGACCTGCACTGAGGTCCTGGAG [3180]  
Pig -GCATGGGGGACCTGCACCAAGGG-----CCTGGGGACC--GCA-----GAG [3180]  
Mouse ----TTGAAGGTTGAAAATGAAGG-----CCTCCTGGGGTCCCGTCTTAAG-----GGT [3180]

Cow GGGCCTGGGTGGAGATCCCTGGCTTTCCCTTCCA--GACACCACCGCCACCAGCA---G [3240]  
Human GGGCGCCAGTTGTGTCTCCCGGTTTTCCCTTCCACAGACACCATTGCCACCACCATTAG [3240]  
Pig GCGCCCGGGCGGACCTCTCCGACTTTCGCCCTCGA--GACACCACCGCCACCAGCC---A [3240]  
Mouse TGTCTGTCCAGACGTCCCCAACCTCCGTCTGGAA--GACACA-----G [3240]

Cow GCAAACACCCTCCGCCTCAGTTTCTCCACCCCCACCGTCCCTTCCCCCCACCCATCCAG [3300]  
Human GCAAACATCCTTCGCCTCAGTTTCTCC--CCCCACC-TCCCTCTCCTCCACCCATCCAG [3300]  
Pig GCAAACACCCTCCGCCTCAGTTTCTCCACCCCCACCGACCC-CTCCCCCACCCATCCAG [3300]  
Mouse GCAGATAGCGCTCGCCTCAGTTTCTCCACCCCCACAGCTCTGCTCCTCCACCCACCCAG [3300]

Cow GGGGCGGGGCCAGAGGTCAAGGCTAGTGGGTGGGATTGGGGAGGGAGAGAGGTGTTGAGC [3360]  
Human GGGGCGGGGCCAGAGGTCAAGGCTAGTGGGTGGGACTGGGGAGGGAGAGAGGGGTTGAGT [3360]  
Pig GGGGCGGGGCCAGAGGTCAAGGCTAGTGGGTGGGATTGGGGAGGGAGAGAGGTGTCGAGC [3360]  
Mouse GGGGCGGGGCCAGAGGTCAAGGCTAGAGGGTGGGATTGGGGAGGGAGAG-----GTGAAAC [3360]

Sp1/Sp3 HRE

Cow AGTCTC-TAGGAGATCCCTCGTTTTCTTAGGCCCCCGGCTCGGGGTGCCTTCCTTCCCC [3419]  
Human AGTCCC-TTCGCAAGCCCTCATTTACACAGGCCCCCGGCTTGGGGCGCCTTCCTTCCCC [3419]  
Pig AGTCCCCTTGGAGAGCCCTGGTTTTACTGGGCCCCCGGCTTGGGGCGCCTTCCTTCCCC [3419]  
Mouse CGTCCC-TAGGTGAGCCGTCTTTCCACAGGCCCCCGGCTCGGGGTGCCACCTTCCCC [3419]

C  
R  
1

Supplementary Figure 1. Alignment of porcine Oct4 5' upstream regulatory sequences (URSs) with its human, cow and mouse orthologs. Four conserved region appear in shades of yellow. The HRE site, 2A box in DE, 1A and 1B box in PE have been underlined. The regulatory protein binding sites are circled.
